1 **Title:** Metabolite profiling reveals organ-specific flavone accumulation in *Scutellaria* and  
2 identifies a scutellarin isomer isoscutellarein 8-O- $\beta$ -glucuronopyranoside

3

4

5 **Running title:** Organ-specific metabolite profiles in *Scutellaria*

6

7 Bryce C. Askey<sup>1</sup>, Dake Liu<sup>2</sup>, Garret M. Rubin<sup>2</sup>, Andrew R. Kunik<sup>1</sup>, Yeong Hun Song<sup>1</sup>,

8 Yousong Ding<sup>2,\*</sup> and Jeongim Kim<sup>1,3,\*</sup>

9

10 <sup>1</sup>Horticultural Sciences Department, University of Florida, Gainesville, FL, 32611

11 <sup>2</sup>Department of Medicinal Chemistry, Center for Natural Products, Drug Discovery and  
12 Development (CNPD3), University of Florida, Gainesville, Florida 32610, United States

13 <sup>3</sup>Plant Molecular and Cellular Biology Graduate Program, University of Florida,  
14 Gainesville, FL, 32611

15

16 **\*Corresponding Authors:** Jeongim Kim; jkim6@ufl.edu, Yousong Ding;

17 yding@cop.ufl.edu

18

19

20 **ORCID:**

21 Bryce C. Askey; braskey@ufl.edu: 0000-0002-4449-6891

22 Dake Liu; dakeliu@ufl.edu : 0000-0003-2193-0111

23 Garret M. Rubin; garretr@ufl.edu :0000-0001-6750-7453

24 Andrew R. Kunik; akunik@ufl.edu: 0000-0002-1541-4551

25 Yeong Hun Song: yhsong@gnu.ac.kr : 0000-0003-4095-5621

26 Yousong Ding; yding@cop.ufl.edu : 0000-0001-8610-0659.

27 Jeongim Kim; jkim6@ufl.edu : 0000-0002-5618-3948

28

29

30

31 **Abstract**

32 *Scutellaria* is a genus of plants containing multiple species with well-documented  
33 medicinal effects. *S. baicalensis* and *S. barbata* are among the best-studied *Scutellaria*  
34 species, and previous works have established flavones to be the primary source of their  
35 bioactivity. Recent genomic and biochemical studies with *S. baicalensis* and *S. barbata*  
36 have advanced our understanding of flavone biosynthesis in *Scutellaria*. However, as  
37 over several hundreds of *Scutellaria* species occur throughout the world, flavone  
38 biosynthesis in most species remains poorly understood. In this study, we analyzed  
39 organ-specific flavone profiles of seven *Scutellaria* species, including *S. baicalensis*, *S.*  
40 *barbata* and two species native to the Americas (*S. wrightii* to Texas and *S. racemosa*  
41 to Central and South America). We found that the roots of almost all these species  
42 produce only 4'-deoxyflavones, while 4'-hydroxyflavones are accumulated exclusively in  
43 their aerial parts. On the other hand, *S. racemosa* and *S. wrightii* also accumulated high  
44 levels of 4'-deoxyflavones in their aerial parts, different with the flavone profiles of *S.*  
45 *baicalensis* and *S. barbata*. Furthermore, our metabolomics and NMR study identified  
46 the accumulation of isoscutellarein 8-O- $\beta$ -glucuronopyranoside, a rare 4'-  
47 hydroxyflavone, in the stems and leaves of several *Scutellaria* species including *S.*  
48 *baicalensis* and *S. barbata*, but not in *S. racemosa* and *S. wrightii*. Distinctive organ-  
49 specific metabolite profiles among *Scutellaria* species indicate the selectivity and  
50 diverse physiological roles of flavones.

## 51 **Introduction**

52 Medicinal plants have been used in the traditional medicines of indigenous  
53 populations for thousands of years. Due to this widespread usage, modern research  
54 techniques are being applied to identify the compounds responsible for these medicinal  
55 properties and to characterize their modes of action (Shang et al., 2010). A negative  
56 consequence of increased attention to and demand for medicinal plants is the  
57 endangerment of native plant populations resulting from overharvesting (Cole et al.,  
58 2007). Therefore, development of biotechnology-based mass production systems for  
59 these medicinal compounds is desirable. Development of effective biotechnology for  
60 chemical production requires an understanding of the biosynthesis of the compounds of  
61 interest. In this work, we analyze the levels of flavones in various organs of multiple  
62 species from the *Scutellaria* genus to better understand flavone biosynthesis in  
63 *Scutellaria*.

64 Part of the mint family Lamiaceae, *Scutellaria* is a genus of plants containing  
65 several hundred species with well-documented medicinal effects. Extracts from the  
66 aerial parts of *S. barbata* are commonly applied in Eastern medicines to treat swelling,  
67 inflammation, and cancer (Tao and Balunas, 2016). These activities, and especially its  
68 anticancer effects, have drawn significant attention to *S. barbata*, and early phase  
69 clinical trials of aqueous extracts have demonstrated its selective cytotoxicity towards  
70 breast cancer cells (Chen et al., 2012). In addition, *S. barbata* extracts have exhibited  
71 remarkable activity towards multi-drug resistant strains of bacteria (Tsai et al., 2018). *S.*  
72 *baicalensis* is another species extensively applied in Eastern medicines, with extracts of  
73 its roots being prescribed to treat diarrhea, dysentery, hypertension, inflammation, and a  
74 variety of other diseases (Zhao et al., 2019b). Numerous clinical studies have  
75 demonstrated the neuroprotective, antibacterial, antitumor, antioxidant, and other  
76 beneficial health effects of these extracts (Zhu et al., 2016; Saralamma et al., 2017; Tao  
77 et al., 2018).

78 One class of bioactive compounds in *Scutellaria* is flavones (Karimov and  
79 Botirov, 2017; Zhao et al., 2019b). *Scutellaria* species produce two classes of flavones:  
80 4'-hydroxyflavones and 4'-deoxyflavones (Fig. 1, Fig. S1). 4'-Hydroxyflavones,  
81 including apigenin and its derivatives, are relatively common across the plant kingdom

82 whereas 4'-deoxyflavones, which include chrysin and its derivatives, are relatively rare  
83 outside of *Scutellaria* with the exception of several plant species not in the genus (Kato  
84 et al., 1992; Rao et al., 2002; Rao et al., 2009). Recent works in *S. baicalensis* and *S.*  
85 *barbata* have identified multiple enzymes responsible for flavone biosynthesis in  
86 *Scutellaria*, and have described the differential activity of specific enzymes towards  
87 either 4'-hydroxyflavones or 4'-deoxyflavones (Zhao et al., 2016; Zhao et al., 2018;  
88 Zhao et al., 2019a). The enzyme selectivity leads to an organ-specific pattern of flavone  
89 accumulation. In this pattern, 4'-hydroxyflavones accumulate at higher concentrations in  
90 the aerial parts of the plant than in the roots, and the roots contain higher  
91 concentrations of 4'-deoxyflavones as compared to the aerial parts (Tao and Balunas,  
92 2016; Xu et al., 2020).

93 Flavone profiles of *S. baicalensis* and *S. barbata* have been described and their  
94 reference genomes have been established to further support the biosynthetic studies of  
95 flavones. However, due to the large number of uncharacterized species in the genus, it  
96 is unknown if the overall flavone pathway and the organ-specific accumulation patterns  
97 of *S. baicalensis* and *S. barbata* are well-conserved across the genus. In this work, we  
98 aimed to expand the current knowledge of flavone diversity in *Scutellaria* by analyzing  
99 metabolite profiles of seven species. These species included two well-studied species,  
100 *S. baicalensis* and *S. barbata*, and two species native to warm climates, *S. racemosa*  
101 and *S. wrightii*. Furthermore, we selected three other *Scutellaria* species widely  
102 distributed in Europe, Asia, and North America, including *S. altissima*, *S. tournefortii*, and  
103 *S. leonardii* (Hasaninejad et al., 2009; Shang et al., 2010; Sutter et al., 2011),  
104 respectively. During this analysis, we unexpectedly identified a 4'-hydroxyflavone which  
105 has not been included in recent biosynthetic studies of *S. baicalensis*. We elucidated  
106 the structure of this 4'-hydroxyflavone and quantified its level in the seven species. Our  
107 results revealed diversity in site and type of flavone accumulated across the species we  
108 selected.

109

## 110 **Materials and Methods**

### 111 **Plant growth conditions**

112 Plants of seven *Scutellaria* species were grown from seed at the University of  
113 Florida (Gainesville, Florida, USA) in indoor, climate-controlled conditions at 21-23 °C.  
114 Fluorescent lighting of intensity 140  $\mu\text{E m}^{-2} \text{s}^{-1}$  was applied in a 16 hour light / 8 hour  
115 dark cycle. Plants were watered every 5-8 days, and root, stem, and leaf tissue samples  
116 collected in biological triplicate 6-8 weeks after germination. Seeds of all species except  
117 for those of *S. racemosa* and *S. wrightii* were obtained from retailers (*S. altissima*, *S.*  
118 *baicalensis*, and *S. tournefortii*, from Plant World Seeds, and *S. barbata* and *S. leonardii*  
119 from Plairie Moon Nursery). To collect seeds of *S. racemosa*, mature plants were taken  
120 from a field in Hattiesburg, Mississippi, USA, and grown in indoor, climate-controlled  
121 conditions at the University of Florida until seeds were ready to harvest. Seeds of *S.*  
122 *wrightii* were collected directly from mature plants grown in outdoor greenhouse  
123 conditions at Far South Wholesale Nursery (Austin, Texas, USA). Herbarium vouchers  
124 of all species were submitted to the University of Florida Herbarium, and voucher  
125 numbers are provided in Table S3.

126

### 127 **Flavone extraction and quantification**

128 With High Performance Liquid Chromatography (HPLC), 15 flavones were  
129 quantified from root, stem, and leaf tissue samples of plants. The flavones quantified  
130 included seven 4'-hydroxyflavones, which were apigenin, apigenin-7-glucuronide  
131 (apigenin 7-G), scutellarein, scutellarin, hispidulin, hispiduloside, and isoscutellarein-8-  
132 glucuronide (isoscutellarein 8-G). The remaining eight flavones were 4'-deoxyflavones,  
133 which were chrysin, chrysin-7-glucuronide (chrysin 7-G), baicalein, baicalin, oroxylin A,  
134 oroxyloside, wogonin, and wogonoside. The fresh weight of each tissue sample was  
135 determined with an analytical balance immediately after harvesting. An extraction  
136 solution of 50% HPLC grade methanol was added to each so that the following ratio  
137 was achieved: 30 mg tissue/1 mL solvent. Samples were then sonicated for 1 hour at  
138 room temperature. Following sonication, the extraction solution was withdrawn and  
139 further diluted with additional 50% methanol to achieve a final ratio of 1 mg tissue/1 mL  
140 solvent. To remove any remaining particulate, extractions were centrifuged at 15,000  
141 rpm for 5 minutes, and syringe filtered with a filter having a pore size of 0.45  $\mu\text{m}$ .

142 Flavones were quantified in this final extraction with a Thermo Scientific  
143 (Massachusetts, USA) UltiMate 3000 HPLC system. Flavones were separated with a 3  
144 x 100 mm Acclaim RSLC 120 C18 column, and eluted by a mixture of 0.1% formic acid  
145 (A) and 100 % acetonitrile (B) with the following gradient: -8 to 0 min, 5% B; 2 min, 25%  
146 B; 2 to 6 min, 25% B; 9 min, 50% B; 9 to 11 min, 50% B; 15 min, 95% B; and 15 to 23  
147 min, 95% B. A flowrate of 0.5 mL/min was used and the column oven temperature set  
148 to 40°C. Peak areas were measured at wavelength 276 nm. For all flavones except for  
149 isoscutellarein 8-G, calibration mixes of 0.1, 0.5, 1, 5, 10, 25, 50, and 100 ppm were  
150 used to convert peak areas to concentrations in ppm. Chemical standards used to  
151 prepare calibration mixes were purchased from ChemFaces (Wuhan, China) or  
152 MilliporeSigma (Massachusetts, USA), and dissolved in dimethylsulfoxide to generate  
153 stocks of 1000, 2000, or 4000 ppm. These stocks were then diluted with 50% methanol  
154 and mixed to generate calibration mixes of the varying concentrations. With the peak  
155 areas of these calibration mixes and the molecular weight of each metabolite, flavone  
156 concentrations in  $\mu\text{mol/g}$  fresh weight were calculated. For relative concentration of  
157 isoscutellarein 8-G, only peak areas are reported.

158

### 159 **LC-HRMS**

160 LC-HRMS and HRMS/MS experiments were conducted on Thermo Scientific™ Q  
161 Exactive Focus mass spectrometer with Dionex™ Ultimate™ RSLC 3000 uHPLC  
162 system, equipped with H-ESI II probe on Ion Max API Source. Acetonitrile (B)/Water (A)  
163 containing 0.1% formic acid were used as mobile phases. A typical LC program with a  
164 0.5mL/min flow rate included: 10% B for 2 min, 10-95% B in 8.5 mins, 95% B for 2.5  
165 mins, 95 to 10 % B in 0.5 mins, and re-equilibration in 2% B for 2 mins. The eluents  
166 from the first 2 mins and last 3 mins were diverted to a waste bottle by a diverting valve.  
167 MS1 signals were acquired under the Full MS positive ion mode covering a mass range  
168 of m/z 150-2000, with a resolution at 35,000 and a AGC target at 1e6. Fragmentation  
169 was obtained using MS2 discovery and Parallel Reaction Monitoring (PRM) mode using  
170 an inclusion list of calculated parental ions. Precursor ions were selected in the orbitrap  
171 typically with an isolation width of 3.0 m/z and fragmented in the HCD cell with step-

172 wise collision energies (CE) of 20, 25, and 30. For some ions, the isolation width was  
173 2.0 m/z and step-wise CE of 15, 20, and 25 were used.

174

### 175 **NMR analysis**

176 For the NMR analysis, 1.6 mg of compound were dissolved in 40  $\mu$ l DMSO- $d_6$ . 1D and  
177 2D spectra were recorded in a 1.7 mm TCI CryoProbe on a Bruker Avance Neo-600  
178 Console system (MagneX 14.1 T/54 mm AS Magnet) at Advanced Magnetic Resonance  
179 Imaging and Spectroscopy facility, McKnight Brain Institute, University of Florida.  
180 Spectroscopy data were collected and processed using Topspin 4.1.3 software.

### 181 **Chemical shifts**

182  **$^1\text{H}$  NMR** (600 MHz, DMSO- $d_6$ ):  $\delta_{\text{H}}$  12.82 (OH, br, s, 5), 10.34 (OH, br, s, 4'), 8.07 (2H, d,  
183  $J = 8.66$  Hz, 2', 6'), 6.93 (2H, d,  $J = 8.66$  Hz, 3', 5'), 6.83 (1H, s, 3), 6.29 (1H, s, 6), 5.44  
184 (OH, br, s, 7), 4.82 (1H,  $J = 7.91$  Hz, 1''), 3.82 (1H, d,  $J = 9.65$  Hz, 5''), 3.51 (1H, t,  $J =$   
185  $9.26$  Hz, 4''), 3.49 (1H, t,  $J = 8.55$  Hz, 2''), 3.35 (1H, t,  $J = 9.03$  Hz, 3'').  **$^{13}\text{C}$  NMR** (151  
186 MHz, DMSO- $d_6$ ):  $\delta_{\text{C}}$  181.72 (C-4), 169.96 (C-6''), 163.86 (C-2), 161.12 (C-4'), 157.23 (C-  
187 7), 156.90 (C-5), 149.19 (C-9), 128.85 (C-2', C-6'), 125.11 (C-8), 120.96 (C-1'), 115.96  
188 (C-3', C-5'), 106.25 (C-1''), 103.35 (C-10), 102.33 (C-3), 98.86 (C-6), 76.00 (C-5''),  
189 75.20 (C-3''), 73.69 (C-2''), 71.41 (C-4'').

190

191

## 192 **Results**

### 193 **Organ-specific flavone diversity across seven *Scutellaria* species**

194 We selected seven species of *Scutellaria* for organ-specific flavone profiling with  
195 High Performance Liquid Chromatography (HPLC). These species included *S.*  
196 *altissima*, *S. baicalensis*, *S. barbata*, *S. leonardii*, *S. racemosa*, *S. tournefortii*, and *S.*  
197 *wrightii*. *S. baicalensis* and *S. barbata* have been used in East Asian medicines for  
198 thousand years. *S. racemosa* is native to South and Central America (Klings and Neal,  
199 2001), and *S. wrightii* occurs in southwestern regions of North America, such as Texas  
200 (Nelson and Goetze, 2010). *S. altissima*, *S. tournefortii*, and *S. leonardii* are widely  
201 distributed in Europe, Asia, and North America (Hasaninejad et al., 2009; Shang et al.,  
202 2010; Sutter et al., 2011), but their flavone profiles have not been studied extensively.  
203 We grew plants of each species from seed in climate-controlled conditions, and  
204 harvested tissue samples from the roots, stems, and leaves of mature plants in  
205 biological triplicate. We then quantified concentrations of six 4'-hydroxyflavones (**1**;  
206 apigenin, **2**; apigenin 7-glucuronide (apigenin 7-G), **3**; scutellarein, **4**; scutellarin, **5**;  
207 hispidulin, **6**; hispiduloside) and eight 4'-deoxyflavones (**7**; chrysin, **8**; chrysin 7-  
208 glucuronide (chrysin 7-G), **9**; baicalein, **10**; baicalin, **11**; oroxylin A, **12**; oroxyloside, **13**;  
209 wogonin, **14**; wogonoside) in these samples (Fig. 2, Table 1).

210 Our root-specific flavone profiling indicated that the 4'-deoxyflavone pathway  
211 appears to be very well-conserved across all seven species (Fig. 2c). We detected at  
212 least six of eight tested 4'-deoxyflavones in the root of each species (Table 1).  
213 Interestingly, although chrysin is proposed to serve as a precursor for all other 4'-  
214 deoxyflavones, we found it at a low level ( $0.40 \pm 0.08 \mu\text{mol} / \text{g}$  fresh weight) only in the  
215 root of *S. leonardii*, and its glycosylated form, chrysin 7-G, appeared in the roots of  
216 three species, *S. baicalensis*, *S. leonardii*, and *S. tournefortii* (Table 1), ranging from  
217 0.08 to 0.30  $\mu\text{mol} / \text{g}$  fresh weight. On the other hand, we observed the accumulation of  
218 baicalein, baicalin, oroxylin A, and oroxyloside in the roots of all seven species (Fig. 1).  
219 Except for *S. tournefortii*, all species accumulated 1.4 to 12 times more baicalein and  
220 baicalin than oroxylin A and oroxyloside (Fig. 2c, Table 1), presumably suggesting the  
221 relatively low catalytic activity of 6-OMT (Fig. 1). The highest amount of baicalein (18.10



222  $\pm 1.37 \mu\text{mol} / \text{g}$  fresh weight) and baicalin ( $43.99 \pm 9.53 \mu\text{mol} / \text{g}$  fresh weight) was  
223 found in the root of *S. wrightii*, followed by *S. baicalensis* (baicalein:  $0.20 \pm 0.03 \mu\text{mol} / \text{g}$   
224 fresh weight; baicalin  $32.81 \pm 2.22 \mu\text{mol} / \text{g}$  fresh weight). Interestingly, the root of *S.*  
225 *wrightii* also produced the highest amount of oroxylin A ( $1.17 \pm 0.38 \mu\text{mol} / \text{g}$  fresh  
226 weight) and oroxyloside ( $4.22 \pm 1.17 \mu\text{mol} / \text{g}$  fresh weight), while *S. leonardii* was the  
227 second best producer. Chrysin can also be converted to wogonin and wogonoside  
228 through the reaction of SbF8H and Sb8-OM (Fig. 1). The roots of all species  
229 accumulated  $1.60 \pm 0.25$  to  $7.61 \pm 0.15 \mu\text{mol} / \text{g}$  fresh weight of wogonin and  
230 wogonoside, except for *S. leonardii* whose root had no wogonoside. Finally, the  
231 absence of 4'-hydroxyflavones in the roots of all but one species (*S. leonardii*) indicates  
232 their specificity to the aerial organs of the plant in most species we selected.

233 Aerial tissue-specific flavone profiles of the selected species were much more  
234 varied than root-specific profiles (Fig. 2a, b). First, we detected two to four of six  
235 selected 4'-hydroxyflavones in the leaves of all species analyzed, and one to five in  
236 their stems (Fig. 2). Of note, this pathway seemed to be inactive in the roots (Figs. 1  
237 and 2). Except for *S. baicalensis* and *S. wrightii*, the leaves of these species  
238 accumulated more 4'-hydroxyflavones than the stems. The highest amount of 4'-  
239 hydroxyflavones in the leaves was observed in *S. barbata* ( $6.21 \mu\text{mol} / \text{g}$  fresh weight),  
240 followed by *S. altissima* ( $5.10 \mu\text{mol} / \text{g}$  fresh weight) (Table 1). Among all species, the  
241 leaves of *S. wrightii* contained the lowest amount of 4'-hydroxyflavones ( $0.15 \mu\text{mol} / \text{g}$   
242 fresh weight), while its stems accumulated  $2.76 \mu\text{mol} / \text{g}$  fresh weight of these  
243 compounds. Among the six selected 4'-hydroxyflavones, we were unable to detect  
244 hispidulin, or its glucoside, hispiduloside, in the leaves or stems of two species, *S.*  
245 *altissima* and *S. tournefortii*. Hispiduloside was particularly rare, and out of all tissue  
246 samples taken, we only detected it in the stems of *S. racemosa*. Although these more  
247 advanced steps in the biosynthetic pathway may not be well-conserved (Fig. 1), the  
248 accumulation of scutellarin in the aerial tissues of all seven species indicates at least  
249 partial retention of 4'-hydroxyflavone biosynthesis in these species (Fig. 2a, b).  
250 Apigenin is a biosynthetic precursor of all other selected 4'-hydroxyflavones.  
251 Interestingly, it was scarcely accumulated, as we detected apigenin at low levels ( $0.02$   
252 to  $0.19 \mu\text{mol} / \text{g}$  fresh weight) in the aerial tissues of only two species, *S. baicalensis*

253 and *S. leonardii*. This pattern is analogous to the low accumulation of chrysin in our root  
254 tissue samples.

255 In addition to 4'-hydroxyflavones, we observed that several species accumulate  
256 one to eight of the selected 4'-deoxyflavones in their aerial parts. Remarkably, the  
257 leaves of all seven species accumulated chrysin (0.03 to 25.34  $\mu\text{mol} / \text{g}$  fresh weight).  
258 Except for *S. barbata* the stems of all species also produced chrysin (0.01 to 5.37  $\mu\text{mol}$   
259 / g fresh weight). The wide distribution and accumulation of chrysin in the aerial parts  
260 are strikingly different with its accumulation in the roots (Figs 2 and 3). Furthermore, *S.*  
261 *racemosa* accumulated 51.85 and 27.78  $\mu\text{mol} / \text{g}$  fresh weight of 4'-deoxyflavones in its  
262 leaves and stems, higher than their levels in the roots (12.94  $\mu\text{mol} / \text{g}$  fresh weight). *S.*  
263 *wrightii* also accumulated a high concentration of 4'-deoxyflavones in their stems (54.35  
264  $\mu\text{mol} / \text{g}$  fresh weight), while its roots produced 73.70  $\mu\text{mol} / \text{g}$  fresh weight. Of note, *S.*  
265 *leonardii*, *S. racemosa*, and *S. wrightii* accumulated high concentrations of oroxylin A or  
266 oroxyloside in their stems, and *S. racemosa* also in its leaves (Fig. 3, Table 1). This  
267 finding is especially remarkable considering the relative rarity of these 4'-deoxyflavones  
268 in *S. baicalensis* and *S. barbata*, two well-studied species (Fig. 3). Overall, our detection  
269 of chrysin in the leaves of all species analyzed and baicalein in stems and leaves of  
270 most species suggests that specificity of 4'-deoxyflavones in roots is less than that of  
271 4'-hydroxyflavones in aerial tissues.

272

### 273 **The structural elucidation of a new scutellarin isomer**

274 During our metabolite analysis, we detected multiple new metabolites which we  
275 were unable to unambiguously assign their identities. Of these unknown metabolites,  
276 one drew our interest because of its pattern of accumulation across the tissue samples  
277 we collected (Fig. 4). In our HPLC chromatograms, we detected the peak corresponding  
278 to this metabolite in the aerial parts of *S. baicalensis* and *S. barbata*, but not in *S.*  
279 *racemosa*. The peak was absent in root chromatograms collected from all seven  
280 species. The aerial specificity of this unknown metabolite led us to hypothesize that it  
281 was a 4'-hydroxyflavone. To elucidate its structure, we analyzed the unknown  
282 metabolite from our *S. barbata* leaf extracts by the liquid chromatography-high  
283 resolution mass spectrometry (LC-HRMS). Interestingly, its molecular weight was

284 identical to scutellarin ( $[M + H]^+$   $m/z$  463.0866, calculated for  $C_{21}H_{19}O_{12}^+$ , 463.0871), but  
285 they were eluted with different retention times ( $t_m = 6.28$  min for scutellarin vs 6.94 min  
286 for the unknown compound)(Fig. 5a). Furthermore, they gave rise to the same major  
287 MS/MS fragment, suggesting them to be two isomers (Fig. S2).

288 To further elucidate the structure of this compound, we performed 1D and 2D NMR  
289 analysis (Figs. S3-5). Comparison of its  $^1H$  and  $^{13}C$  chemical shifts to those of  
290 scutellarin allowed the assignment of D-glucuronide (C1'' to 6''), 1,4-disubstituted  
291 benzene ring (C1' to 6'), and the carbons on the flavone ring (Jiang et al., 2016)(Fig. 5b,  
292 Table S1). Based on the  $^1H$  chemical shift and coupling constant of the anomer proton  
293 H-1'' ( $J = 7.86$  Hz), the glucuronyl moiety was determined to be on the  $\beta$  configuration  
294 (Ko et al., 2018). Compared with scutellarin, the aromatic proton at  $\delta_H$  6.99 (1H, s) was  
295 initially assigned to H-8 of the flavone. However, according to 1D-selective nuclear  
296 overhauser effect spectroscopies (NOSEY, resonance frequency at 6.28 ppm or 12.81  
297 ppm) and an 1D-selective rotating frame overhauser enhancement spectroscopy  
298 (ROSEY, resonance frequency at 12.81 ppm), OH-5 correlates with H-3 ( $\delta = 6.83$ ) and  
299 a proton at  $\delta = 6.29$  (Fig. 5b), leading to the assignment of this proton at 6 position ( $\delta =$   
300 6.29 ppm). This assignment was further supported by the weak NOE effects of H-6 with  
301 OH-5 and H-1'' on the glucuronyl moiety, which further indicated the proximity of the  
302 glucuronyl moiety at 7 or 8 position. H-1'' also showed weak NOE effects with H2' and  
303 H6' on the 1,4-disubstituted benzene ring, suggesting the potential configuration of the  
304 compound, where the glucuronyl moiety could be close to the aromatic system.  
305 According to an HMBC correlation from H1'' to C8 of the flavone, we then definitely  
306 assigned the glucuronyl moiety at 8 position (Fig. 5b). Collectively, our 1D and 2D NMR  
307 analysis revealed the isolated compound as isoscutellarein 8-O- $\beta$ -glucuronopyranoside  
308 (isoscutellarein 8-G). Comparison with the reported  $^1H$  and  $^{13}C$  chemical shifts of this  
309 compound (Billeter et al., 1991) confirmed this structural determination (Table S2).

310 After confirming the identity of this unknown metabolite as isoscutellarein 8-G, we  
311 then quantified its relative abundance in all organ-specific tissue samples we collected  
312 (Fig. 6, Table 2). Isoscutellarein 8-G was accumulated only in the aerial parts of all  
313 species, matching the pattern which we had previously observed for 4'-hydroxyflavones  
314 including scutellarin. *S. barbata* accumulated the greatest overall concentrations of

315 isoscutellarein 8-G in its stems. *S. baicalensis*, *S. altissima*, and *S. tournefortii* also  
316 accumulated isoscutellarein 8-G in their stems. In contrast, *S. leonardii*, *S. racemosa*,  
317 and *S. wrightii* accumulated no isoscutellarein 8-G in their aerial parts. It is noteworthy  
318 that these three species accumulated oroxylin A and its glycoside in their aerial parts  
319 (Fig. 3).

320

## 321 Discussion

322 From our analysis of organ-specific flavone diversity, we determined profiles for  
323 *S. baicalensis* and *S. barbata*, which matched closely with previous publications (Zhao  
324 et al., 2016; Xu et al., 2020). In these flavone profiles, high concentrations of 4'-  
325 deoxyflavones accumulated in the roots, and much lower concentrations of 4'-  
326 deoxyflavones and 4'-hydroxyflavones accumulated in the stems and leaves (Fig 2,  
327 Table 1). As described by Q. Zhao et al. (2016), the root-favored accumulation of 4'-  
328 deoxyflavones by *S. baicalensis* is due to root-specific overexpression of several  
329 enzyme isoforms with activity exclusively, or near exclusively in 4'-deoxyflavone  
330 biosynthesis (Zhao et al., 2016). In contrast to the pattern we observed in *S. baicalensis*  
331 and *S. barbata*, we identified that *S. racemosa* and *S. wrightii* accumulated higher  
332 concentrations of 4'-deoxyflavones in their aerial parts as compared to their roots (Fig  
333 2, Table 1). Also, all seven species accumulated chrysin and/or chrysin 7-glucuronide in  
334 their leaves (Fig 2a, Table 1). This suggests that the expression of 4'-deoxyflavone  
335 enzyme isoforms is not perfectly root-specific, and some enzymes having activities  
336 toward 4'-deoxyflavone precursors such as SbCLL-7 and SbCHS-2 may be active in  
337 both roots and aerial parts at least under our growth conditions. It is also possible that  
338 some fraction of 4'-deoxyflavones are synthesized in the roots and then transported to  
339 the aerial parts. The fact that 4'-hydroxyflavones were not detected in roots of most  
340 species indicates the selectivity of enzymes towards either 4'-deoxyflavones or 4'-  
341 hydroxyflavones (or their respective precursors), as well as organ-specific regulation of  
342 biosynthetic gene expression.

343 We found that *S. racemosa* accumulates the highest concentrations of oroxylin  
344 A, and its 7-glucuronide, oroxyloside, in its leaves, among all organs of all species (Fig.  
345 3, Table 1). *S. wrightii* also accumulated notable amounts of oroxylin A and oroxyloside

346 in its stem, but not in its leaves. Oroxylin A is a 4'-deoxyflavone which has been  
347 demonstrated to exhibit memory enhancement and neuroprotective effects in rat models  
348 (Jeon et al., 2011; Jeon et al., 2012). The most likely route for oroxylin A biosynthesis is  
349 the methylation of baicalein at its 6-OH group (Fig. 1) (Elkin et al., 2018). Although  
350 previous works have identified a variety of O-methyltransferases (OMTs) in plants, the  
351 enzymes with high specificity for the 6-OH group in flavonoids are rare, as this reaction  
352 is biochemically unfavorable (Zhang et al., 2016a). Work in sweet basil (*Ocimum*  
353 *basilicum*), a species also in the Lamiaceae family with *Scutellaria*, identified a  
354 methyltransferase capable of specific methylation of the 6-OH group of scutellarein  
355 (Berim et al., 2012). Scutellarein is a 4'-hydroxyflavone identical in structure to baicalein  
356 apart from its 4'-OH group. To ensure the proper orientation of its substrate, and thus its  
357 regioselectivity, the *O. basilicum* OMT uses a threonine residue to form a hydrogen  
358 bond with the 4'-OH group of scutellarein. However, as baicalein has no 4'-OH group, it  
359 would be impossible for a regioselective OMT in *S. racemosa* or *S. wrightii* to rely on  
360 this interaction during the methylation of baicalein. Research by Zhang et al. (2016) in a  
361 liverwort species (*Plagiochasma appendiculatum*) identified a methyltransferase  
362 (PaF6OMT) that is capable of methylation of the 6-OH group in baicalein (Zhang et al.,  
363 2016b). As this OMT has not yet been structurally characterized, how it achieves its  
364 specificity remains unknown. Future work in *S. racemosa* and *S. wrightii* should be  
365 directed towards characterizing its biosynthesis of oroxylin A, with specific attention paid  
366 to the potential specialization of OMTs in the pathway. Overall, *S. racemosa* and *S.*  
367 *wrightii* are promising targets for biotechnology improvement due to the significant  
368 bioactive effects of oroxylin A and oroxyloside. Considering that both species occur in  
369 warm area (Texas and South America) (Krings and Neal, 2001; Nelson and Goetze,  
370 2010), accumulation of oroxylin A and oroxyloside in these species may indicate the  
371 physiological relevance of oroxylin A and oroxyloside in these species.

372 Isoscutellarein 8-G was first detected in the liverwort species *Marchantia*  
373 *berteroana* (Markham and Porter, 1975). Following this initial report, Miyaichi et al.  
374 detected the flavone in the aerial parts of *S. indica* and *S. baicalensis* (Miyaichi et al.,  
375 1988a; Miyaichi et al., 1988b). Aside from these works, few other studies have reported  
376 isoscutellarein 8-G in *Scutellaria*, though several have detected its aglycone and 7-O-

377 glycosylated forms (Karimov and Botirov, 2017). This rarity in detection may be a result  
378 of its low abundance relative to other glycosylated flavones in *Scutellaria*. A potential  
379 reason for this low abundance is its unique glycosylation at the 8-O position. Flavone 7-  
380 O glycosylation is more common in *Scutellaria* due to the presence of a hydroxyl group  
381 at the 7-O position in all flavones synthesized via the core flavone pathway (Fig. 1). On  
382 the other hand, 8-O glycosylation first requires the activity of an 8-hydroxylase to add  
383 the free hydroxyl group to which the carbohydrate will be attached. As the purpose of  
384 glycosylation is typically to increase the stability of the flavone for long term storage  
385 (Slámová et al., 2018), it's possible that 8-O glycosylation provides slightly greater  
386 stability as compared to 7-O glycosylation. Therefore, it would be preferable to  
387 glycosylate isoscutellarein at the 8-O position, even though a free hydroxyl group is also  
388 present at the 7-O position. Several species may have evolved regioselective  
389 glycosyltransferase enzymes for this purpose. Researchers working with a  
390 glycosyltransferase from *Bacillus cereus* demonstrated that a single amino acid  
391 substitution could alter the primary site of quercetin glycosylation with high specificity  
392 (Chiu et al., 2016). Perhaps a similar mutation occurs in several *Scutellaria* species to  
393 allow the biosynthesis of isoscutellarein 8-G. Alternatively, it's possible that the  
394 glycosyltransferase enzymes of these species which accumulate isoscutellarein 8-G  
395 have less strict regioselectivity, and are capable of glycosylation at both 7-G and 8-G  
396 positions. Quantification of isoscutellarein 7-G alongside isoscutellarein 8-G would  
397 provide valuable insight regarding these theories. Based on current understanding of  
398 flavone biosynthesis, we propose a possible route of isoscutellarein and isoscutellarein  
399 8-G production from apigenin (Fig. S6). Further organ-specific transcriptome study is  
400 required to identify enzymes responsible for of isoscutellarein and isoscutellarein 8-G  
401 production.

402 Our quantification of isoscutellarein 8-G across the seven *Scutellaria* species we  
403 analyzed revealed an intriguing pattern. Isoscutellarein 8-G was entirely absent in the  
404 species of *S. leonardii*, *S. racemosa*, and *S. wrightii*, all of which accumulate high  
405 concentrations of 4'-deoxyflavones such as oroxylin A and oroxyloside in their aerial  
406 parts. This specific example is representative of a broader pattern - species with high  
407 accumulation of 4'-deoxyflavones in their aerial parts accumulated low concentrations

408 of 4'-hydroxyflavones. This substitution of 4'-hydroxyflavones with 4'-deoxyflavones  
409 potentially indicates an evolution to utilize 4'-deoxyflavones to fulfill the physiological  
410 roles which 4'-hydroxyflavones do in other species. Works in species outside of  
411 *Scutellaria* have demonstrated the anti-herbivory effects of several 4'-hydroxyflavones  
412 we quantified here (Sosa et al., 2004; Gallon et al., 2019). However, little is known  
413 about the physiological role that 4'-deoxyflavones play in plants. Further research  
414 should be devoted to exploring the role of 4'-deoxyflavones in plant growth and stress  
415 response to better understand the evolutionary advantage their biosynthesis and  
416 accumulation offers.  
417

418

419 **References**

420 **Berim A, Hyatt DC, Gang DR** (2012) A Set of Regioselective O-Methyltransferases  
421 Gives Rise to the Complex Pattern of Methoxylated Flavones in Sweet Basil.  
422 *Plant Physiol* **160**: 1052–1069

423 **Billeter M, Meier B, Sticher O** (1991) 8-hydroxyflavonoid glucuronides from *Malva*  
424 *sylvestris*. *Phytochemistry* **30**: 987–990

425 **Chen V, Staub RE, Fong S, Tagliaferri M, Cohen I, Shtivelman E** (2012) Bezielle  
426 Selectively Targets Mitochondria of Cancer Cells to Inhibit Glycolysis and  
427 OXPHOS. *PLOS ONE* **7**: e30300

428 **Chiu H-H, Hsieh Y-C, Chen Y-H, Wang H-Y, Lu C-Y, Chen C-J, Li Y-K** (2016) Three  
429 important amino acids control the regioselectivity of flavonoid glucosidation in  
430 glycosyltransferase-1 from *Bacillus cereus*. *Appl Microbiol Biotechnol* **100**: 8411–  
431 8424

432 **Cole IB, Saxena PK, Murch SJ** (2007) Medicinal biotechnology in the genus  
433 *scutellaria*. *Vitro Cell Dev Biol - Plant* **43**: 318–327

434 **Elkin YN, Kulesh NI, Stepanova AY, Solovieva AI, Kargin VM, Manyakhin AY**  
435 (2018) Methylated flavones of the hairy root culture *Scutellaria baicalensis*. *J*  
436 *Plant Physiol* **231**: 277–280

437 **Gallon ME, Silva-Junior EA, Amaral JG, Lopes NP, Gobbo-Neto L** (2019) Natural  
438 Products Diversity in Plant-Insect Interaction between *Tithonia diversifolia*  
439 (Asteraceae) and *Chlosyne lacinia* (Nymphalidae). *Molecules*. doi:  
440 10.3390/molecules24173118

441 **Hasaninejad M, Jamzad Z, Yousefi M** (2009) Nutlet micro-morphology in *Scutellaria*  
442 *L.*(Lamiaceae) in Iran. *Iran J Bot* **15**: 227–239

443 **Jeon SJ, Bak H, Seo J, Han SM, Lee SH, Han S-H, Kwon KJ, Ryu JH, Cheong JH,**  
444 **Ko KH, et al** (2012) Oroxylin A Induces BDNF Expression on Cortical Neurons  
445 through Adenosine A<sub>2A</sub> Receptor Stimulation: A Possible Role in  
446 Neuroprotection. *Biomol Ther (Seoul)* **20**: 27–35

447 **Jeon SJ, Rhee SY, Seo JE, Bak HR, Lee SH, Ryu JH, Cheong JH, Shin CY, Kim G-**  
448 **H, Lee YS, et al** (2011) Oroxylin A increases BDNF production by activation of  
449 MAPK–CREB pathway in rat primary cortical neuronal culture. *Neurosci Res* **69**:  
450 214–222

451 **Jiang Z, Yang J, Jiao Y, Li W, Chai X, Zhang L, Jiang M, Wang Y** (2016)  
452 Determination of scutellarin in breviscapine preparations using quantitative  
453 proton nuclear magnetic resonance spectroscopy. *J Food Drug Anal* **24**: 392–  
454 398



- 455 **Karimov AM, Botirov EK**h (2017) Structural Diversity and State of Knowledge of  
456 Flavonoids of the *Scutellaria* L. Genus. *Russ J Bioorganic Chem* **43**: 691–711
- 457 **Kato MJ, Yoshida M, Gottlieb OR** (1992) Flavones and lignans in flowers, fruits and  
458 seedlings of *Viola venosa*. *Phytochemistry* **31**: 283–287
- 459 **Ko J-H, Nam YH, Joo S-W, Kim H-G, Lee Y-G, Kang TH, Baek N-I** (2018) Flavonoid  
460 8-O-Glucuronides from the Aerial Parts of *Malva verticillata* and Their Recovery  
461 Effects on Alloxan-Induced Pancreatic Islets in Zebrafish. *Mol J Synth Chem Nat*  
462 *Prod Chem* **23**: 833
- 463 **Krings A, Neal JC** (2001) SOUTH AMERICAN SKULLCAP (*SCUTELLARIA*  
464 *RACEMOSA*: LAMIACEAE) IN THE SOUTHEASTERN UNITED STATES. *SIDA*  
465 *Contrib Bot* **19**: 1171–1179
- 466 **Markham KR, Porter LJ** (1975) Isoscutellarein and hypolaetin 8-glucuronides from the  
467 liverwort *Marchantia berteroana*. *Phytochemistry* **14**: 1093–1097
- 468 **Miyaichi Y, Imoto Y, Saida H, Tomimori T** (1988a) Studies on the Constituents of  
469 *Scutellaria* Species X. : On the Flavonoid Constituents of the Leaves of  
470 *Scutellaria baicalensis* GEORGI. *Jpn J Pharmacogn* **42**: 216–219
- 471 **Miyaichi Y, Kizu H, Tomimori T, Lin C-C** (1988b) Studies on the Constituents of  
472 *Scutellaria* Species XI. : On the Flavonoid Constituents of the Aerial Parts of  
473 *Scutellaria indica* L. *Chem Pharm Bull (Tokyo)* **37**: 794–797
- 474 **Nelson AD, Goetze JR** (2010) Hydroballochory in two Texas species of Skullcap  
475 (*Scutellaria drummodii*, *S. wrightii*; Lamiaceae). *Tex. J. Sci.* 62:
- 476 **Rao VM, Damu GLV, Sudhakar D, Rao CV** (2009) Two New Bio-active Flavones from  
477 *Grangea maderaspatana* (*Artemisia maderaspatana*). *Asian J Chem* **21**: 7
- 478 **Rao YK, Reddy MVB, Rao CV, Gunasekar D, Blond A, Caux C, Bodo B** (2002) Two  
479 new 5-deoxyflavones from *Albizia odoratissima*. *Chem Pharm Bull (Tokyo)* **50**:  
480 1271–1272
- 481 **Saralamma VVG, Lee HJ, Hong GE, Park HS, Yumnam S, Raha S, Lee WS, Kim**  
482 **EH, Sung NJ, Lee SJ, et al** (2017) Korean *Scutellaria baicalensis* Georgi  
483 flavonoid extract induces mitochondrially mediated apoptosis in human gastric  
484 cancer AGS cells. *Oncol Lett* **14**: 607–614
- 485 **Shang X, He X, He X, Li M, Zhang R, Fan P, Zhang Q, Jia Z** (2010) The genus  
486 *Scutellaria* an ethnopharmacological and phytochemical review. *J*  
487 *Ethnopharmacol* **128**: 279–313
- 488 **Slámová K, Kapešová J, Valentová K** (2018) “Sweet Flavonoids”: Glycosidase-  
489 Catalyzed Modifications. *Int J Mol Sci* **19**: 2126

- 490 **Sosa T, Chaves N, Alias JC, Escudero JC, Henao F, Gutiérrez-Merino C** (2004)  
491 Inhibition of Mouth Skeletal Muscle Relaxation by Flavonoids of *Cistus ladanifer*  
492 L.: A Plant Defense Mechanism Against Herbivores. *J Chem Ecol* **30**: 1087–1101
- 493 **Sutter RD, Govus TE, Smyth RL, Nordman C, Pyne M, Hogan T** (2011) Monitoring  
494 change in a Central US calcareous glade: resampling transects established in  
495 1993. *Nat Areas J* **31**: 163–172
- 496 **Tao G, Balunas MJ** (2016) Current therapeutic role and medicinal potential of  
497 *Scutellaria barbata* in Traditional Chinese Medicine and Western research. *J*  
498 *Ethnopharmacol* **182**: 170–180
- 499 **Tao Y, Zhan S, Wang Y, Zhou G, Liang H, Chen X, Shen H** (2018) Baicalin, the major  
500 component of traditional Chinese medicine *Scutellaria baicalensis* induces colon  
501 cancer cell apoptosis through inhibition of oncomiRNAs. *Sci Rep* **8**: 14477
- 502 **Tsai C-C, Lin C-S, Hsu C-R, Chang C-M, Chang I-W, Lin L-W, Hung C-H, Wang J-L**  
503 (2018) Using the Chinese herb *Scutellaria barbata* against extensively drug-  
504 resistant *Acinetobacter baumannii* infections: in vitro and in vivo studies. *BMC*  
505 *Complement Altern Med* **18**: 96
- 506 **Xu Z, Gao R, Pu X, Xu R, Wang J, Zheng S, Zeng Y, Chen J, He C, Song J** (2020)  
507 Comparative Genome Analysis of *Scutellaria baicalensis* and *Scutellaria barbata*  
508 Reveals the Evolution of Active Flavonoid Biosynthesis. *Genomics Proteomics*  
509 *Bioinformatics* **18**: 230–240
- 510 **Zhang Y-Y, Xu R-X, Gao S, Cheng A-X** (2016a) Enzymatic production of oroxylin A  
511 and hispidulin using a liverwort flavone 6-O-methyltransferase. *FEBS Lett* **590**:  
512 2619–2628
- 513 **Zhang Y-Y, Xu R-X, Gao S, Cheng A-X** (2016b) Enzymatic production of oroxylin A  
514 and hispidulin using a liverwort flavone 6-O-methyltransferase. *FEBS Lett* **590**:  
515 2619–2628
- 516 **Zhao Q, Cui M-Y, Levsh O, Yang D, Liu J, Li J, Hill L, Yang L, Hu Y, Weng J-K, et al**  
517 (2018) Two CYP82D Enzymes Function as Flavone Hydroxylases in the  
518 Biosynthesis of Root-Specific 4'-Deoxyflavones in *Scutellaria baicalensis*. *Mol*  
519 *Plant* **11**: 135–148
- 520 **Zhao Q, Yang J, Cui M-Y, Liu J, Fang Y, Yan M, Qiu W, Shang H, Xu Z, Yidiresi R,**  
521 **et al** (2019a) The Reference Genome Sequence of *Scutellaria baicalensis*  
522 Provides Insights into the Evolution of Wogonin Biosynthesis. *Mol Plant* **12**: 935–  
523 950
- 524 **Zhao Q, Zhang Y, Wang G, Hill L, Weng J-K, Chen X-Y, Xue H, Martin C** (2016) A  
525 specialized flavone biosynthetic pathway has evolved in the medicinal plant,  
526 *Scutellaria baicalensis*. *Sci Adv* **2**: e1501780

- 527 **Zhao T, Tang H, Xie L, Zheng Y, Ma Z, Sun Q, Li X** (2019b) *Scutellaria baicalensis*  
528 *Georgi.* (Lamiaceae): a review of its traditional uses, botany, phytochemistry,  
529 pharmacology and toxicology. *J Pharm Pharmacol* **71**: 1353–1369
- 530 **Zhu D, Wang S, Lawless J, He J, Zheng Z** (2016) Dose Dependent Dual Effect of  
531 Baicalin and Herb Huang Qin Extract on Angiogenesis. *PLOS ONE* **11**:  
532 e0167125
- 533
- 534

535

536 **Acknowledgments**

537 This work was supported by the United States Department of Agriculture (USDA)-National  
538 Institute of Food and Agriculture Hatch project (005681), a startup fund from the  
539 Horticultural Sciences Department and Institute of Food and Agricultural Sciences at the  
540 University of Florida to J.K, and by NIH (R35 GM128742) to Y.D. NMR studies were  
541 performed in the McKnight Brain Institute at the National High Magnetic Field Laboratory's  
542 AMRIS Facility, which is supported by the National Science Foundation Cooperative  
543 Agreement No. DMR-1644779, the State of Florida, and an NIH award, S10RR031637.  
544 We thank John B. Nelson at A.C. Moore Herbarium and the late William Mark Whitten at  
545 the UF for collecting *S. racemosa* in the field. We also thank Dr. Sangtae Kim for the  
546 discussion and Dr. Swathi Nadakuduti for scutellarin standard.

547

548

549 **Contributions**

550 B.C.A., Y.D., and J.K. designed the research project; B.C.A., D.L., G.M.R, and Y.S.  
551 performed the experiments and analyzed the data; B.C.A., Y.D., and J.K. wrote the  
552 manuscript.

553

554 **Conflict of interests**

555 The authors declare no competing interests.

556

557

558

## 559 **Figure legends**

560 **Figure 1.** Proposed 4'-hydroxyflavone and 4'-deoxyflavone pathway. Structures of  
561 glycosylated flavones are not shown to save space but are included in Fig. S1. Enzyme  
562 names in blue are specific isoforms that have been identified in *S. baicalensis*, and  
563 enzyme names in black are general names. Flavones that were quantified have names  
564 in bold and are numbered to match the labeling of Figure 2.

565 Enzymes are phenylalanine ammonia lyase (SbPAL), cinnamate 4-hydroxylase  
566 (SbC4H), cinnamate-CoA ligase (SbCLL-7), 4-coumarate CoA ligase (SbCLL-1),  
567 chalcone synthase (SbCHS-1), pinocembrin-chalcone synthase (SbCHS-2), chalcone  
568 isomerase (SbCHI), flavone synthase I (SbFNSI), flavone synthase II (SbFNSII), flavone  
569 6-hydroxylase (SBF6H), flavone 8-hydroxylase (SbF8H), and 8-O-methyl transferase  
570 (Sb8-OMT).

571 **Figure 2.** Metabolite data collected from the (a) leaves, (b) stems, and (c) roots of 7  
572 *Scutellaria* species via High Performance Liquid Chromatography (HPLC). Samples  
573 were taken in biological triplicate, and the average concentration of each metabolite  
574 calculated. Metabolites are numbered to match their order of occurrence in the flavone  
575 pathway, shown in Figure 1.

576 **Figure 3.** Organ-specific (a) oroxylin A and (b) oroxyloside concentrations in 7  
577 *Scutellaria* species, as determined via High Performance Liquid Chromatography  
578 (HPLC). Concentrations were averaged from tissue samples taken from 3 biological  
579 replicates, and error bars represent standard error.

580 **Figure 4.** Comparison of chromatograms collected via HPLC from *S. barbata*, *S.*  
581 *baicalensis*, and *S. racemosa* stems. Time interval displayed was selected to center the  
582 unknown peak in the chromatograms.

583 **Figure 5. Characterization of a new scutellarin isomer.** (a). Standard scutellarin and  
584 isolated compound were eluted with different retention times in LC-HRMS analysis.  
585 (b). Key NMR correlations of isolated compound. 1D-NOESY and 1D-ROESY  
586 correlations are represented by red and green two-way arrows, respectively (left). A  
587 three-bond HMBC correlation from H-1'' to C-8 (right).  
588 metabolite. + NMR data used to elucidate structure of unknown metabolite.

589 **Figure 6.** Organ-specific isoscutellarein 8-glucuronide peak areas in 7 *Scutellaria*  
590 species, as determined via High Performance Liquid Chromatography (HPLC). Peak  
591 areas were averaged from tissue samples taken from 3 biological replicates, and error  
592 bars represent standard error.  
593

594

595 **TABLES**

596 **Table 1.** Organ-specific flavone concentrations collected from 7 *Scutellaria* species via  
597 High Performance Liquid Chromatography (HPLC).

598 **Table 2.** Organ-specific isoscutellarein 8-G peak areas collected from 7 *Scutellaria*  
599 species.

600

601 **Supplemental materials**

602 **Figure S1.** Proposed 4'-hydroxyflavone and 4'-deoxyflavone pathway with structures of  
603 glycosylated flavones included. Enzyme names in blue are specific isoforms that have  
604 been identified in *S. baicalensis*, and enzyme names in black are general names.  
605 Flavones that were quantified have names in bold and are numbered to match the  
606 labeling of Figure 2.

607 **Figure S2.** MS (a), and MS/MS (b) spectra of standard scutellarin and isolated compound.

608 **Figure S3.** <sup>1</sup>H NMR spectrum of isolated compound (600 MHz, DMSO-d<sub>6</sub>). Water signals  
609 were suppressed by presaturation.

610 **Figure S4.** <sup>13</sup>C NMR spectrum of isolated compound (151 MHz, DMSO-d<sub>6</sub>).

611 **Figure S5.** 2D NMR spectra of isolated compound. **A:** 1H-1H COSY; **B:** HSQC; **C:** HMBC;  
612 **D:** 2D-NOESY. Positive and negative contours are highlighted in black and green,  
613 respectively.

614 **Figure S6.** Proposed pathway for biosynthesis of isoscutellarein 8-glucuronide in  
615 *Scutellaria*.

616 **Table S1.** Comparison of <sup>1</sup>H (600 MHz, DMSO-d<sub>6</sub>) chemical shifts of the and a previous  
617 literature of scutellarin

618 **Table S2.** Comparison of <sup>1</sup>H (600 MHz, DMSO-d<sub>6</sub>) and <sup>13</sup>C (151 MHz, DMSO-d<sub>6</sub>)  
619 chemical shifts of isolated compound and isoscutellarein 8-O-β-glucuronopyranoside

620 **Table S3.** Voucher information for the species used in this study

621

622

623 **Table 1.** Organ-specific flavone concentrations collected from 7 *Scutellaria* species via  
 624 High Performance Liquid Chromatography (HPLC). Units for all flavones are  $\mu\text{mol} / \text{g}$   
 625 fresh weight. Data is presented as mean  $\pm$  standard error, as calculated from samples  
 626 taken in biological triplicate.  
 627

| Species                | Organ  | Apigenin        | Apigenin 7-G    | Scutellarein    | Scutellarin     | Hispidulin      | Hispiduloside   |
|------------------------|--------|-----------------|-----------------|-----------------|-----------------|-----------------|-----------------|
| <i>S. altissima</i>    | Leaves | 0.00 $\pm$ 0.00 | 0.28 $\pm$ 0.15 | 0.65 $\pm$ 0.28 | 4.17 $\pm$ 1.22 | 0.00 $\pm$ 0.00 | 0.00 $\pm$ 0.00 |
| <i>S. altissima</i>    | Stems  | 0.00 $\pm$ 0.00 | 0.00 $\pm$ 0.00 | 0.00 $\pm$ 0.00 | 1.11 $\pm$ 0.13 | 0.00 $\pm$ 0.00 | 0.00 $\pm$ 0.00 |
| <i>S. altissima</i>    | Roots  | 0.00 $\pm$ 0.00 | 0.00 $\pm$ 0.00 | 0.00 $\pm$ 0.00 | 0.00 $\pm$ 0.00 | 0.00 $\pm$ 0.00 | 0.00 $\pm$ 0.00 |
| <i>S. baicalensis</i>  | Leaves | 0.19 $\pm$ 0.03 | 0.13 $\pm$ 0.01 | 0.27 $\pm$ 0.14 | 0.10 $\pm$ 0.10 | 0.00 $\pm$ 0.00 | 0.00 $\pm$ 0.00 |
| <i>S. baicalensis</i>  | Stems  | 0.12 $\pm$ 0.12 | 0.22 $\pm$ 0.01 | 1.04 $\pm$ 0.43 | 1.76 $\pm$ 0.28 | 0.03 $\pm$ 0.02 | 0.00 $\pm$ 0.00 |
| <i>S. baicalensis</i>  | Roots  | 0.00 $\pm$ 0.00 | 0.00 $\pm$ 0.00 | 0.00 $\pm$ 0.00 | 0.00 $\pm$ 0.00 | 0.00 $\pm$ 0.00 | 0.00 $\pm$ 0.00 |
| <i>S. barbata</i>      | Leaves | 0.00 $\pm$ 0.00 | 0.01 $\pm$ 0.01 | 4.59 $\pm$ 0.33 | 1.51 $\pm$ 0.70 | 0.10 $\pm$ 0.02 | 0.00 $\pm$ 0.00 |
| <i>S. barbata</i>      | Stems  | 0.00 $\pm$ 0.00 | 0.11 $\pm$ 0.02 | 1.90 $\pm$ 0.23 | 1.13 $\pm$ 0.25 | 0.09 $\pm$ 0.01 | 0.00 $\pm$ 0.00 |
| <i>S. barbata</i>      | Roots  | 0.00 $\pm$ 0.00 | 0.00 $\pm$ 0.00 | 0.00 $\pm$ 0.00 | 0.00 $\pm$ 0.00 | 0.00 $\pm$ 0.00 | 0.00 $\pm$ 0.00 |
| <i>S. leonardii</i>    | Leaves | 0.11 $\pm$ 0.01 | 0.00 $\pm$ 0.00 | 0.22 $\pm$ 0.04 | 0.00 $\pm$ 0.00 | 0.13 $\pm$ 0.01 | 0.00 $\pm$ 0.00 |
| <i>S. leonardii</i>    | Stems  | 0.02 $\pm$ 0.02 | 0.00 $\pm$ 0.00 | 0.11 $\pm$ 0.01 | 0.16 $\pm$ 0.08 | 0.07 $\pm$ 0.00 | 0.00 $\pm$ 0.00 |
| <i>S. leonardii</i>    | Roots  | 0.06 $\pm$ 0.03 | 0.00 $\pm$ 0.00 | 0.00 $\pm$ 0.00 | 0.82 $\pm$ 0.19 | 0.10 $\pm$ 0.03 | 0.00 $\pm$ 0.00 |
| <i>S. racemosa</i>     | Leaves | 0.00 $\pm$ 0.00 | 0.00 $\pm$ 0.00 | 0.00 $\pm$ 0.00 | 1.20 $\pm$ 0.35 | 0.63 $\pm$ 0.18 | 0.00 $\pm$ 0.00 |
| <i>S. racemosa</i>     | Stems  | 0.00 $\pm$ 0.00 | 0.00 $\pm$ 0.00 | 0.00 $\pm$ 0.00 | 0.94 $\pm$ 0.33 | 0.25 $\pm$ 0.06 | 0.06 $\pm$ 0.06 |
| <i>S. racemosa</i>     | Roots  | 0.00 $\pm$ 0.00 | 0.00 $\pm$ 0.00 | 0.00 $\pm$ 0.00 | 0.00 $\pm$ 0.00 | 0.00 $\pm$ 0.00 | 0.00 $\pm$ 0.00 |
| <i>S. tournefortii</i> | Leaves | 0.00 $\pm$ 0.00 | 0.28 $\pm$ 0.07 | 0.00 $\pm$ 0.00 | 2.98 $\pm$ 0.65 | 0.00 $\pm$ 0.00 | 0.00 $\pm$ 0.00 |
| <i>S. tournefortii</i> | Stems  | 0.00 $\pm$ 0.00 | 0.00 $\pm$ 0.00 | 0.00 $\pm$ 0.00 | 1.47 $\pm$ 0.46 | 0.00 $\pm$ 0.00 | 0.00 $\pm$ 0.00 |
| <i>S. tournefortii</i> | Roots  | 0.00 $\pm$ 0.00 | 0.00 $\pm$ 0.00 | 0.00 $\pm$ 0.00 | 0.00 $\pm$ 0.00 | 0.00 $\pm$ 0.00 | 0.00 $\pm$ 0.00 |
| <i>S. wrightii</i>     | Leaves | 0.00 $\pm$ 0.00 | 0.00 $\pm$ 0.00 | 0.00 $\pm$ 0.00 | 0.13 $\pm$ 0.09 | 0.02 $\pm$ 0.00 | 0.00 $\pm$ 0.00 |
| <i>S. wrightii</i>     | Stems  | 0.00 $\pm$ 0.00 | 0.03 $\pm$ 0.01 | 0.00 $\pm$ 0.00 | 2.10 $\pm$ 0.25 | 0.63 $\pm$ 0.08 | 0.00 $\pm$ 0.00 |
| <i>S. wrightii</i>     | Roots  | 0.00 $\pm$ 0.00 | 0.00 $\pm$ 0.00 | 0.00 $\pm$ 0.00 | 0.00 $\pm$ 0.00 | 0.00 $\pm$ 0.00 | 0.00 $\pm$ 0.00 |

628  
 629  
 630



631 **Table 1 cont.**

| Species                | Organ  | Chrysin      | Chrysin 7-G | Baicalein    | Baicalin     | Oroxylin A   | Oroxyloside  | Wogonin     | Wogonoside  |
|------------------------|--------|--------------|-------------|--------------|--------------|--------------|--------------|-------------|-------------|
| <i>S. altissima</i>    | Leaves | 0.75 ± 0.07  | 2.62 ± 0.18 | 0.70 ± 0.18  | 0.00 ± 0.00  | 0.00 ± 0.00  | 0.00 ± 0.00  | 0.00 ± 0.00 | 0.00 ± 0.00 |
| <i>S. altissima</i>    | Stems  | 0.04 ± 0.02  | 0.35 ± 0.05 | 0.15 ± 0.05  | 0.47 ± 0.38  | 0.00 ± 0.00  | 0.06 ± 0.06  | 0.34 ± 0.26 | 1.26 ± 0.51 |
| <i>S. altissima</i>    | Roots  | 0.00 ± 0.00  | 0.00 ± 0.00 | 0.07 ± 0.00  | 5.07 ± 0.66  | 0.14 ± 0.02  | 0.64 ± 0.07  | 2.90 ± 0.21 | 2.30 ± 0.26 |
| <i>S. baicalensis</i>  | Leaves | 4.84 ± 0.53  | 1.45 ± 0.24 | 0.19 ± 0.08  | 0.20 ± 0.11  | 0.00 ± 0.00  | 0.00 ± 0.00  | 0.00 ± 0.00 | 0.00 ± 0.00 |
| <i>S. baicalensis</i>  | Stems  | 0.18 ± 0.04  | 0.09 ± 0.01 | 0.06 ± 0.03  | 0.87 ± 0.87  | 0.00 ± 0.00  | 0.00 ± 0.00  | 0.11 ± 0.11 | 0.02 ± 0.02 |
| <i>S. baicalensis</i>  | Roots  | 0.00 ± 0.00  | 0.30 ± 0.01 | 0.20 ± 0.03  | 32.81 ± 2.22 | 0.23 ± 0.13  | 0.87 ± 0.87  | 3.49 ± 0.18 | 6.43 ± 0.43 |
| <i>S. barbata</i>      | Leaves | 0.03 ± 0.00  | 0.00 ± 0.00 | 0.00 ± 0.00  | 0.00 ± 0.00  | 0.00 ± 0.00  | 0.00 ± 0.00  | 0.00 ± 0.00 | 0.00 ± 0.00 |
| <i>S. barbata</i>      | Stems  | 0.00 ± 0.00  | 0.00 ± 0.00 | 0.00 ± 0.00  | 0.00 ± 0.00  | 0.00 ± 0.00  | 0.00 ± 0.00  | 0.03 ± 0.02 | 0.00 ± 0.00 |
| <i>S. barbata</i>      | Roots  | 0.00 ± 0.00  | 0.00 ± 0.00 | 1.49 ± 0.04  | 2.59 ± 0.49  | 0.08 ± 0.01  | 0.34 ± 0.18  | 3.88 ± 0.34 | 1.77 ± 0.30 |
| <i>S. leonardii</i>    | Leaves | 25.34 ± 0.72 | 0.79 ± 0.09 | 0.22 ± 0.03  | 0.07 ± 0.03  | 0.59 ± 0.11  | 0.00 ± 0.00  | 0.07 ± 0.07 | 0.06 ± 0.02 |
| <i>S. leonardii</i>    | Stems  | 5.37 ± 0.41  | 0.91 ± 0.31 | 0.34 ± 0.14  | 0.17 ± 0.08  | 0.37 ± 0.03  | 0.03 ± 0.03  | 1.24 ± 0.09 | 0.10 ± 0.05 |
| <i>S. leonardii</i>    | Roots  | 0.40 ± 0.08  | 0.18 ± 0.04 | 0.12 ± 0.03  | 5.35 ± 0.94  | 1.86 ± 0.31  | 2.18 ± 0.33  | 5.62 ± 1.10 | 0.00 ± 0.00 |
| <i>S. racemosa</i>     | Leaves | 0.12 ± 0.01  | 0.00 ± 0.00 | 0.34 ± 0.29  | 7.59 ± 1.95  | 14.39 ± 2.58 | 29.39 ± 8.00 | 0.02 ± 0.02 | 0.00 ± 0.00 |
| <i>S. racemosa</i>     | Stems  | 0.03 ± 0.03  | 0.00 ± 0.00 | 0.24 ± 0.22  | 6.36 ± 2.13  | 5.09 ± 1.09  | 15.17 ± 4.14 | 0.44 ± 0.03 | 0.45 ± 0.19 |
| <i>S. racemosa</i>     | Roots  | 0.00 ± 0.00  | 0.00 ± 0.00 | 0.08 ± 0.02  | 6.98 ± 1.20  | 0.44 ± 0.11  | 2.02 ± 0.38  | 1.82 ± 0.06 | 1.60 ± 0.25 |
| <i>S. tournefortii</i> | Leaves | 0.49 ± 0.02  | 4.69 ± 0.97 | 0.53 ± 0.13  | 0.00 ± 0.00  | 0.00 ± 0.00  | 0.00 ± 0.00  | 0.00 ± 0.00 | 0.06 ± 0.06 |
| <i>S. tournefortii</i> | Stems  | 0.01 ± 0.01  | 0.15 ± 0.04 | 0.28 ± 0.07  | 0.08 ± 0.04  | 0.00 ± 0.00  | 0.06 ± 0.03  | 0.13 ± 0.05 | 2.43 ± 0.66 |
| <i>S. tournefortii</i> | Roots  | 0.00 ± 0.00  | 0.08 ± 0.04 | 0.13 ± 0.06  | 0.93 ± 0.08  | 0.08 ± 0.01  | 1.24 ± 0.14  | 2.33 ± 0.20 | 7.61 ± 0.15 |
| <i>S. wrightii</i>     | Leaves | 0.82 ± 0.17  | 0.13 ± 0.09 | 0.78 ± 0.18  | 1.21 ± 0.63  | 0.10 ± 0.02  | 0.16 ± 0.05  | 0.00 ± 0.00 | 0.00 ± 0.00 |
| <i>S. wrightii</i>     | Stems  | 0.99 ± 0.37  | 2.23 ± 0.11 | 3.10 ± 1.31  | 29.90 ± 0.92 | 2.24 ± 0.43  | 14.87 ± 0.26 | 0.62 ± 0.07 | 0.40 ± 0.11 |
| <i>S. wrightii</i>     | Roots  | 0.00 ± 0.00  | 0.00 ± 0.00 | 18.10 ± 1.37 | 43.99 ± 9.53 | 1.17 ± 0.38  | 4.22 ± 1.17  | 3.13 ± 0.53 | 3.09 ± 0.87 |

632

633 **Table 2.** Organ-specific isoscutellarein 8-G peak areas collected from 7 *Scutellaria*  
634 species via High Performance Liquid Chromatography (HPLC). Data is presented as  
635 mean  $\pm$  standard error, as calculated from samples taken in biological triplicate.  
636

| Species                | Organ  | Isoscutellarein 8-G |
|------------------------|--------|---------------------|
| <i>S. altissima</i>    | Leaves | 0.00 $\pm$ 0.00     |
| <i>S. altissima</i>    | Stems  | 0.26 $\pm$ 0.01     |
| <i>S. altissima</i>    | Roots  | 0.00 $\pm$ 0.00     |
| <i>S. baicalensis</i>  | Leaves | 0.10 $\pm$ 0.05     |
| <i>S. baicalensis</i>  | Stems  | 2.17 $\pm$ 0.60     |
| <i>S. baicalensis</i>  | Roots  | 0.00 $\pm$ 0.00     |
| <i>S. barbata</i>      | Leaves | 2.34 $\pm$ 0.49     |
| <i>S. barbata</i>      | Stems  | 3.89 $\pm$ 0.60     |
| <i>S. barbata</i>      | Roots  | 0.00 $\pm$ 0.00     |
| <i>S. leonardii</i>    | Leaves | 0.00 $\pm$ 0.00     |
| <i>S. leonardii</i>    | Stems  | 0.00 $\pm$ 0.00     |
| <i>S. leonardii</i>    | Roots  | 0.00 $\pm$ 0.00     |
| <i>S. racemosa</i>     | Leaves | 0.00 $\pm$ 0.00     |
| <i>S. racemosa</i>     | Stems  | 0.00 $\pm$ 0.00     |
| <i>S. racemosa</i>     | Roots  | 0.00 $\pm$ 0.00     |
| <i>S. tournefortii</i> | Leaves | 0.18 $\pm$ 0.03     |
| <i>S. tournefortii</i> | Stems  | 0.90 $\pm$ 0.24     |
| <i>S. tournefortii</i> | Roots  | 0.00 $\pm$ 0.00     |
| <i>S. wrightii</i>     | Leaves | 0.00 $\pm$ 0.00     |
| <i>S. wrightii</i>     | Stems  | 0.00 $\pm$ 0.00     |
| <i>S. wrightii</i>     | Roots  | 0.00 $\pm$ 0.00     |

637  
638

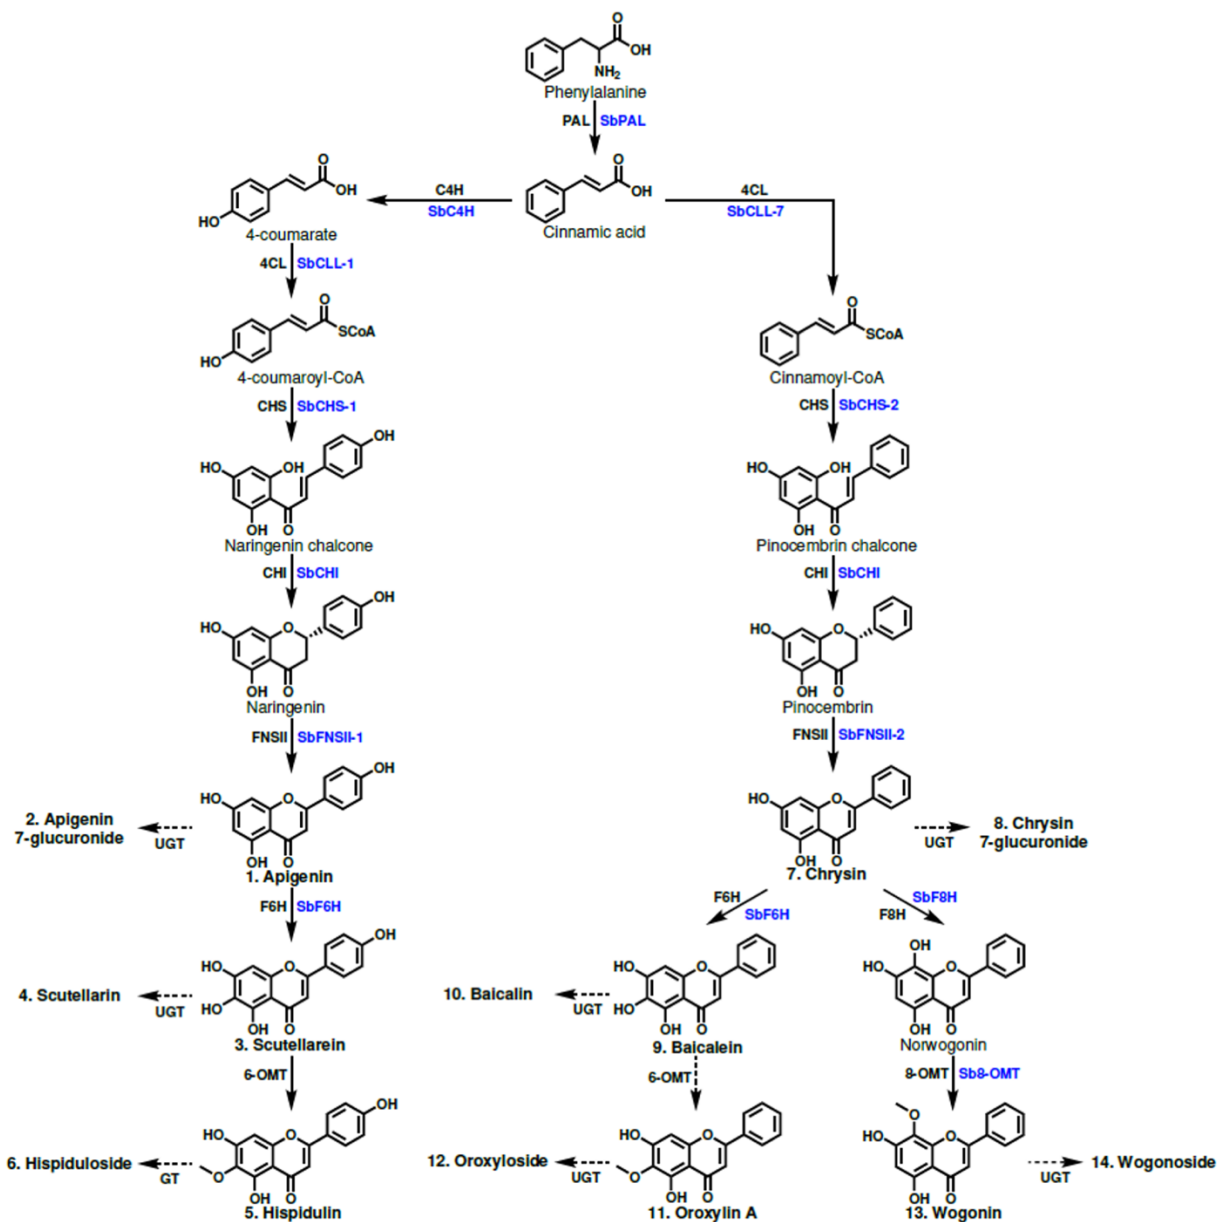

639  
 640 Fig 1

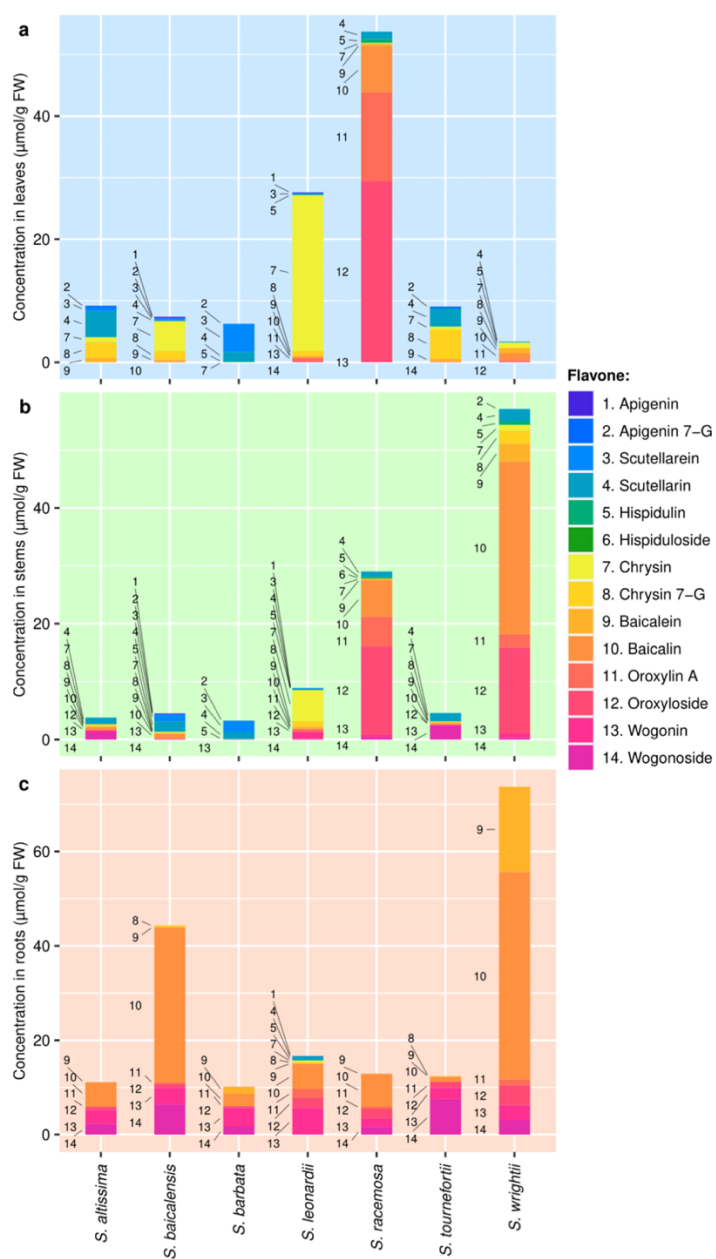

641  
642 Fig 2

643

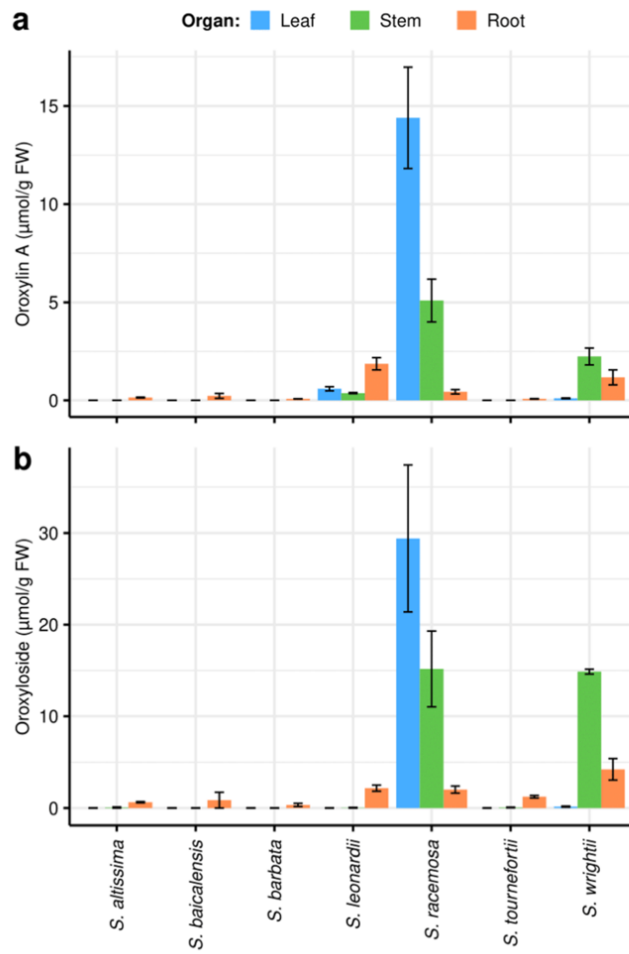

644  
645 Fig 3  
646

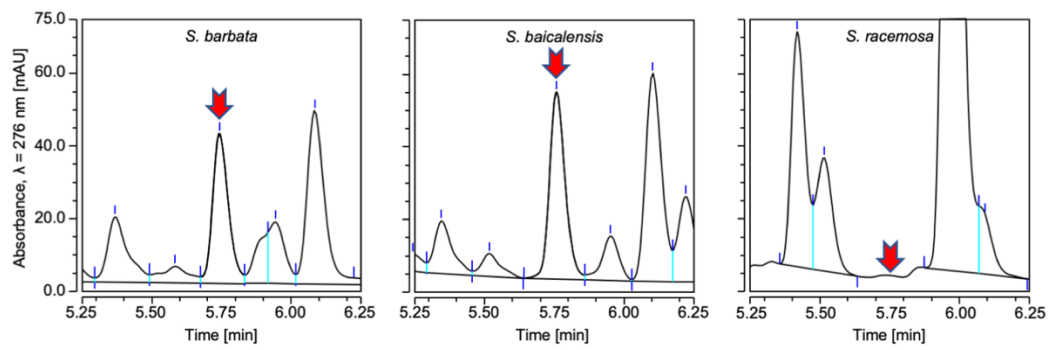

647  
648  
649 Fig 4

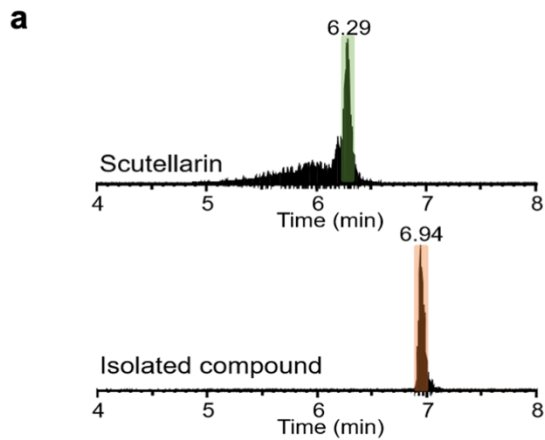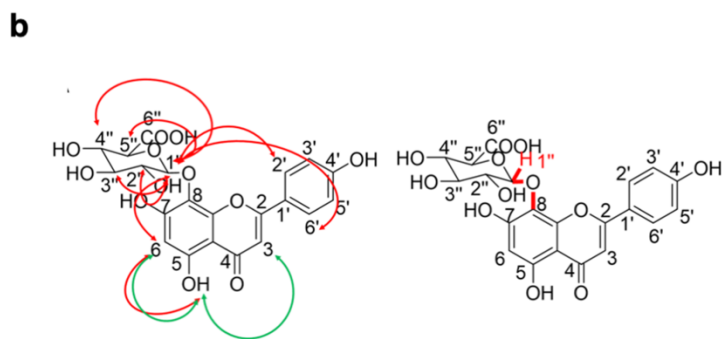

650  
651 Fig 5  
652

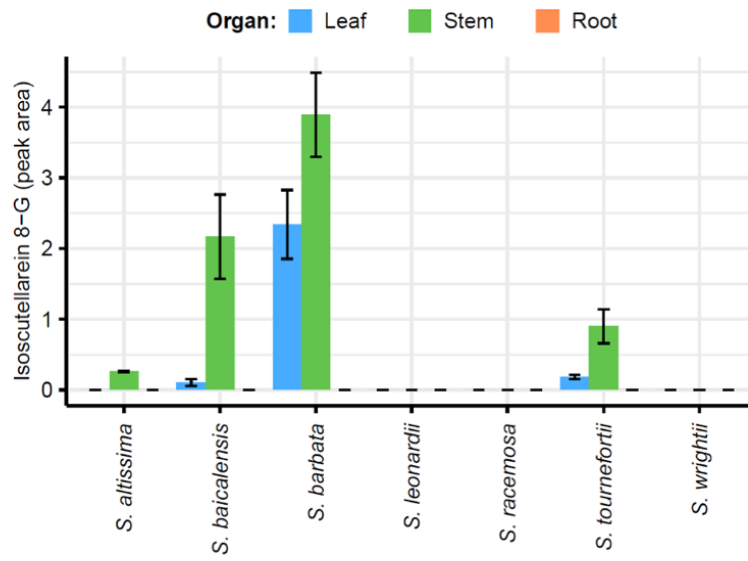

653  
654 Fig 6
